# Supplementary material
Source: publisher figshare collection journal article supplement (https://tandf.figshare.com/ndownloader/files/14209454)
Supplement: Supplementary file 1 [file 14209454]

**Supplementary Table S1**. A selection of “modern” (seabed) and ancient conduit carbonate concretions and/or seep carbonate or limestone examples of MDAC (methane-derived authigenic carbonate) from the literature (author publications arranged chronologically), including their age, main MDAC morphologies and mineralogies, and range of carbonate stable carbon (δ13C) and oxygen (δ18O) isotope values. Interpreted MDAC origins based mainly on their isotope compositions. The last column is a generalised assignment of the main MDAC types for each example into the inferred environmental settings used in this paper (i.e. seep limestone, formed at the seafloor; conduit concretions, formed below the seafloor; or both). AOM = anaerobic oxidation of methane. HMC = high-Mg calcite. LMC = low-Mg calcite. NA = not addressed.

| **Authors** | **Location** | **Age** | **Main MDAC morphology** | **Mineralogy** | **δ13C ‰ VPDB** | **δ13C interpretation** | **δ18O ‰ VPDB** | **δ18O interpretation** | **Inferred main MDAC setting** |
| --- | --- | --- | --- | --- | --- | --- | --- | --- | --- |
| Hovland et al. (1985, 1987) | North Sea | Seabed (pock-marks) | Slabs/blocks  Crusts  Cements | Arag (botry)  HMC | -61.1 to -52.2 | Oxidation of thermogenic methane gas | +1.9 to +4.7 | Pptn from cold (7oC) bottom waters | Seep limestone |
| Beauchamp & Savard (1992) | Canadian Arctic | Cret | Fossiliferous mounds (+ ppts) | Calcite | -50 to -35 | AOM (+ aerobic oxidation of CH4) | -4 to +2 | Ambient marine pore waters | Seep limestone |
| Jörgensen  (1992) | Kattegat, Denmark | Seabed | Pillars, slabs, blocks, pavements | Dolomite  HMC & aragonite | -61 to -34  -57 to -26 | AOM  AOM | +3.2 to +4.1  +0.4 to +2.8 | NA  Marine | Conduit concretions, exhumed |
| Clari et al. (1994) | Marmorito,  Piedmont,  N Italy | Mio | *Lucina* lst + ppts | Calcite | -30.4 to -12 | AOM (+ oxic dissoln) + mixing bicarb | +0.1 to +4.9 | Low To pore fluids | Seep limestone |
| Orpin (1997) | Otago shelf, NZ | Seabed | Chimneys | Dolomite  Dolomite | -12.8 to -4.9  +16.3 | Degradn org mat  Resid C methano | +4.9 to +5.4  +1.8 | Marine  Marine | Conduit concretions, exhumed |
| Bohrmann et al. (1998); Teichert et al. (2005) | Hydrate Ridge, Cascadia margin | Near below seabed | Dissem. xtals  Layers (after spongy hydrate (clathrite) | Arag (yellow, botry, isopa) in cavities in gas hydrates  (HMC) | -54 to -40 | Consistent with a methane source | +3.3 to +4.9 | Gas hydrate dissociation | Seep limestone |
| Sassen et al. (1998) | Gulf of Mexico | Seabed | NA | NA | -24 to -19 | Bacterial oxidn of hydrate-bound methane | NA | NA | NA |
| Stakes et al. (1999) | Monterey Bay, California | Seabed | Chimneys, pavements, slabs | Dolomite  HMC | -56.0 to -46.4  -35.3 to -32.4 | AOM | +3.5 to +5.7  +6.6 to +6.7 | Mix marine & meteoric waters | Conduit concretions, exhumed |

| **Authors** | **Location** | **Age** | **Main MDAC morphology** | **Mineralogy** | **δ13C ‰ VPDB** | **δ13C interpretation** | **δ18O ‰ VPDB** | **δ18O interpretation** | **Inferred main MDAC setting** |
| --- | --- | --- | --- | --- | --- | --- | --- | --- | --- |
| Aiello et al. (2001) | Monterey Bay, California | Mio | Pipes, pavements, lenses | Calcite | -9 to -4 | AOM or resid C from methano | -1.2 to +1.9 | Marine, low To fluids | Conduit concretions |
| Greinert et al. (2001) | Hydrate Ridge | Seabed & near below | Chemoherm complexes | Aragonite  (HMC)  (LMC, dolo) | -55.2 to -38.0 | Decomp. org. mat. via sulphate reduction | +3.0 to +12.2 | Gas hydrate dissociation | Seep limestone |
| Pierre et al. (2002) ; Pierre & Rouchy (2004) | Lorca Basin,  Mediter-ranean | Late Mio | Nodules, layers | Dolomite | -26 to +10  (most >0) | Residual C from methanogenesis | -2 to +5 | Hydrate dissociation | Nodular concretions |
| Díaz-del-Río et al. (2003) | Gulf of Cadiz, Portugal | Seabed | Diverse chimney types | Fe-dolomite, ankerite, calcite | -40 to -20 | AOM | +0.5 to +6 | Episodic hydrate dissociation | Conduit concretions,  exhumed |
| Mazzini et al. (2003) | Gryphon Field, North Sea | Tert | Tubes, dykes | Calcite | -35.5 to -18 | AOM | -2.9 to -0.1 | Shallow burial, mixed marine & meteoric | Conduit concretions |
| Schwartz et al. (2003) | Panoche Hills, California | Cret-Pal | Intrusions + fossiliferous slabs/blocks | HMC  (dolomite, calcite) | -14 to -9 | Mixing thermo + bio CH4 oxid + marine bicarb | -1.5 to +0.5 | Marine | Both |
| Boetius & Suess (2004) | Hydrate Ridge | Seabed | Chemoherms Chimneys | Aragonite  HMC | -65 to -38 | AOM for sulphide production & carbonate pptn | NA | Hydrates involved | Seep limestone |
| Clari et al. (2004) | Monfer-rato, Italy | Mio | Pipes, slabs, blocks, ff lsts | Dolomite | -25 to -10 | Mixing AOM + marine bicarb | +4 to +8 | Hydrate dissociation | Both, but includes  olistostromal  examples |
| Conti et al. (2004) | Nth Apennines, Italy | Mid Mio | Chemoherms  Lenses  (brecciated, reworking) | Calcite (Dolomite) | -36 to -3.6 | AOM + mixing DIC with marine pore waters | -4 to +1.5 | NA; infer hydrate dissociation | Both, but includes olistostromal examples |
| Majima et al. (2005) | Japan | Cret to Holo | Nodular & discontin to mound-like (Some pipes) | Aragonite  Calcite  Dolomite | -60 to -20 | AOM + mixing marine | -10 to +5 | Mainly NA, but refer to hydrate dissociation | Seep limestone |
| **Authors** | **Location** | **Age** | **Main MDAC morphology** | **Mineralogy** | **δ13C ‰ VPDB** | **δ13C interpretation** | **δ18O ‰ VPDB** | **δ18O interpretation** | **Inferred main MDAC setting** |
| De Boever et al. (2006) | Varna, Bulgaria | Early Eo | Large chimneys | Calcite | -43 to -8 | CH4 derived C + mixing marine bicarb or resid C | -8 to -1 | Marine to elev To; some high fluid flow rates | Conduit concretions |
| Bojanowski (2007) | Carpathi-ans, Poland | Oligo | Lenticular mounds | Calcite | -39 to -16 | AOM | NA | NA, but infer gas hydrates | Seep limestone |
| Judd et al. (2007) | Irish Sea | Seabed | Mounds (5-10 m high)  Boulders, ff | Arag (acic)  (HMC)  Framb pyrite | -46 to -41 | MDAC from AOM | NA | NA | Seep limestone |
| Clari et al. (2009) | Monfer-rato, NW Italy | Oligo-Mio | *Lucina* lsts, blocks, big concretions, veins | Dolomite  Calcite | -45 to -10 | AOM + mixing DIC in pore waters | 0 to +8 | Hydrate dissociation, possible clay dehydration | Seep limestone, some reworked |
| Campbell et al. (2010) | East Coast Basin, NZ | Just beneath seabed | Nodular to irregular layers | Aragonite  (HMC) | -50.3 to -0.6 | AOM | +0.8 to +3.2 | Gas hydrate dissociation and/or clay dehydration | Seep limestone |
| Nyman et al. (2010) | Cape Turnagain, NZ | Late Mio | Pipe  Pipe/bulbous | Calcite  Dolomite | -21 to +12  -0.5 to +13 | Extensive AOM  and/or mixing microbial CH4  & methanogenic CO2 | -1 to +5  +1.8 to +5.5 | Dissociation of gas hydrates | Conduit concretions |
| Nyman & Nelson (2011) | Taranaki Basin, NZ | Late Mio | Pipe  Bulbous  Conduit fill | Calcite  Dolomite  Calcite | -40 to -25  -10 to +10  -1 to +5 | AOM  Methanogenic CO2 and/or signif. CH4 oxidn | -2 to +3  +0.2 to +5  -6 to -1 | Episodes of gas hydrate fm & dissociation | Conduit concretions |
| Pierre et al. (2012) | SW Africa | Seabed & near below | Carb crusts  Chemo ff | HMC  Aragonite | -61 to -40 | Variable rates of AOM | +2.4 to +6.2 | Bottom water To ± hydrate dissociation | Seep limestone |
| Kiel et al. (2013) | East Cape region, NZ | Cret | Fenestrae and vug fills | Calcite varieties | -29.2 to +7.1 | AOM + marine carbonate | -15 to 0 | Marine pore water to burial diagenesis | Seep limestone |
| Angeletti et al. (2015) | SE Adriatic Sea | Seabed Pleist | Pipe/tubular  concretions | Dolomite  (calcite) | -30.8 to +2.5 | Degradation of seeping H/Cs, AOM | +3.0 to +6.0 | Low To ambient fluids | Conduit concretions |

| **Authors** | **Location** | **Age** | **Main MDAC morphology** | **Mineralogy** | **δ13C ‰ VPDB** | **δ13C interpretation** | **δ18O ‰ VPDB** | **δ18O interpretation** | **Inferred main MDAC setting** |
| --- | --- | --- | --- | --- | --- | --- | --- | --- | --- |
| Blumen-berg et al. (2015) | Nth Apennines, Italy | Plio-Pleist | Pipe/tubular  concretions | Dolomite, ankerite,  kutnohorite | -26.4 to -13.3 | SO4 reduction using alkaline fluids, ?AOM | +4.0 to +5.6 | NA | Conduit concretions |
| Cau et al. (2015) | Stirone R,  Apennines,  Italy | Plio | Chimneys  Chemoherms  Lst breccia | Dolomite  HMC + LMC | -37.5 to -17.6 | AOM | +2.2 to +5.9 | Hydrate dissociation or low temps | Both |
| Cavagna et al. (2015) | Piedmont Basin, NW Italy | Late Mio | Cylindrical & macro-concretions,  *Lucina* lsts | Dolomite | -34.3 to -9.7 | AOM | +4 to +8 | Possibly hydrate dissociation | Both, some reworked limestone |
| Ge et al.  (2015) | S China Sea  NE Taiwan | Seabed  Plio | Chimneys  & crusts  Chimneys | Dolomite,  aragonite, HMC | -57.6 to -24.0 | AOM from biogenic source | NA | NA | Conduit concretions |
| Little et al. (2015) | Antarctica | Late Cret | Carb bodies (chemo ff)  Concretions  Burrows | Complex calcite cement fabrics | -58 to -25 | AOM | -8.3 to +2.1 | NA | Both,  including burrow fed conduits |
| Oppo et al. (2015) | Enza River, Nth Apennines,  Italy | Pleist | Chimneys  Slabs | Dolomite | -28.6 to -8.6 | AOM from biogenic source in SO4-depleted fluids + connate | +4.4 to +6.2 | Ambient fluids | Conduit and slabby concretions |
| Reitner et al. (2015) | Vocontian Basin, France | Early Cret | Pipe/sausage concretions | Calcite  (Fe calcite) | -25 to +1 | AOM + SO4  reduction | -5 to 0 | Marine, increasing fluid Tos | Conduit concretions (burrow fed) |
| Wiese et al. (2015) | Basque Country, N Spain | Early Cret | Pipe concretions in burrows | ?Calcite  (several phases) | -30.8 to -3.2 | AOM dominates | -8 to -11  mainly | NA | Conduit concretions (burrow fed) |
| Zwicker et al. (2015) | Washing-ton State, USA | Oligo | Pipe concretions in burrows | Aragonite  Calcite  Matrix micrite | -50.6 to -41.2  -2.3 to +3.9  -41 to -19 | AOM early fill  Methano late fill  AOM | +0.8 to +1.5  -6.5 to -4  -4 to 0 | Marine  Increasing To during burial | Both  (burrow fed) |
| Nelson et al. (2017) | East Cape, NZ | Late Mio | Doughnut  (Pipe) | Dolomite  Dolomite | +6 to +9 | Extensive AOM | +2 to +6 | Dissociation of gas hydrates | Conduit concretions |

**References**

Aiello IW, Garrison RE, Moore JC, Kastner M, Stakes DS. 2001. Anatomy and origin of carbonate structures in a Miocene cold-seep field. Geology 29:1111-1114.

Angeletti L, Canese S, Franchi F, Montagna P, Reitner J, Walliser EO, Taviani M. 2015. The “chimney forest” of the deep Montenegrin margin, south-eastern Adriatic Sea. Marine and Petroleum Geology 66:542-554.

Beauchamp B, Savard M. 1992. Cretaceous chemosynthetic carbonate mounds in the Canadian Arctic. Palaios 7:434-450.

Blumenberg M, Eric-Otto Walliser E-O, Taviani M, Seifert R, Reitner J. 2015. Authigenic carbonate formation and its impact on the biomarker inventory at hydrocarbon seeps - A case study from the Holocene Black Sea and the Plio-Pleistocene Northern Apennines (Italy). Marine and Petroleum Geology 66:532-541.

Boetius A, Suess E. 2004. Hydrate Ridge: a natural laboratory for the study of microbial life fuelled by methane from near-surface gas hydrates. Chemical Geology 205:291-310.

Bohrmann G, Greinert J, Suess E, Torres M. 1998. Authigenic carbonates from the Cascadia subduction zone and their relation to gas hydrate stability. Geology 26:647-650.

Bojanowski MJ. 2007. Oligocene cold-seep carbonates from the Carpathians and their inferred relation to gas hydrates. Facies 53:347-360.

Campbell KA, Nelson CS, Alfaro AC, Boyd S, Greinert J, Nyman S, Grosjean E, Logan GA, Gregory MR, Cooke S, Linke P. 2010. Geological imprint of methane seepage on the seabed and biota of the convergent Hikurangi Margin, New Zealand: Box core and grab carbonate results. Marine Geology 272:285-306.

Cau S, Franchi F, Roveri M, Taviani M. 2015. The Pliocene-age Stirone River hydrocarbon chemoherm complex (Northern Apennines, Italy). Marine and Petroleum Geology 66:582-595.

Cavagna S, Clari P, Dela Pierre F, Martire L, Natalicchio M. 2015. Sluggish and steady focussed flows through fine-grained sediments: The methane-derived cylindrical concretions of the Tertiary Piedmont Basin (NW Italy). Marine and Petroleum Geology 66:596-605.

Clari PS, Cavagna S, Martire L, Hunziker J. 2004. A Miocene mud volcano and its plumbing system: A chaotic complex revisited (Monferrato, NW Italy). Journal of Sedimentary Research 74:662-676.

Clari P, Dela Pierre F, Martire L, Cavagna S. 2009. The Cenozoic CH4-derived carbonates of Monferrato (NW Italy): A solid evidence of fluid circulation in the sedimentary column. Marine Geology 265:167-184.

Clari P, Fornara L, Ricci B, Zuppi GM. 1994. Methane-derived carbonates and chemosymbiotic communities of Piedmont (Miocene, northern Italy): An update. Geo-Marine Letters 14:201-209.

Conti S, Fontana D, Gubertini A, Sighinolfi G, Tateo F, Fioroni C, Fregni P. 2004. A multidisciplinary study of middle Miocene seep-carbonates from the northern Apennine foredeep (Italy). Sedimentary Geology 169:1-19.

De Boever E, Swennen R, Dimitrov L. 2006. Lower Eocene carbonate cemented chimneys (Varna, NE Bulgaria): Formation mechanisms and the (a)biological mediation of chimney growth? Sedimentary Geology 185:159-173.

Díaz-del-Río V, Somoza L, Martinez-Frias J, Mata MP, Delgado A, Hernandez-Molina FJ, Lunar R, Martin-Rubi JA, Maestro A, Fernández-Puga MC, León R, Llave E, Medialden T, Vázquez JT. 2003. Vast fields of hydrocarbon-derived carbonate chimneys related to the accretionary wedge/olistostrome of the Gulf of Cádiz. Marine Geology 195:177-200.

Ge L, Jiang S-Y, Blumenberg M, Reitner J. 2015. Lipid biomarkers and their specific carbon isotopic compositions of cold seep carbonates from the South China Sea. Marine and Petroleum Geology 66:501-510.

Greinert J, Bohrmann G, Suess E. 2001. Methane-venting and gas hydrate-related carbonates at the Hydrate Ridge: Their classification, distribution and origin. In: Paull CK and Dillon WP, editors. Natural Gas Hydrates: Occurrence, Distribution, and Detection. Geophysical Monograph 124:99-113.

Hovland M, Talbot M, Olaussen S, Aasberg L. 1985. Recently formed methane-derived carbonates from the North Sea floor. In: Petroleum Geochemistry in Exploration of the Norwegian Shelf. Springer, Dordrecht. Pp. 263-266.

Hovland M, Talbot MR, Qvale H, Olaussen S, Aasberg L. 1987. Methane-related carbonate cements in pockmarks of the North Sea. Journal of Sedimentary Petrology 57:881-892.

Jörgensen NO. 1992. Methane-derived carbonate cementation of marine sediments from the Kattegat, Denmark: Geochemical and geological evidence. Marine Geology 103:1-13.

Judd A, Croker P, Tizzard L, Voisey C. 2007. Extensive methane-derived authigenic carbonates in the Irish Sea. Geo-Marine Letters 27:259-267.

Kiel S, Birgel D, Campbell KA, Crampton JS, Schiøler P, Peckmann J. 2013. Cretaceous methane-seep deposits from New Zealand and their fauna. Palaeogeography, Palaeoclimatology, Palaeoecology 390:17-34.

Little CTS, Birgel D, Boyce AJ, Crame JA, Francis JE, Kiel S, Peckmann J, Pirrie D, Rollinson GK, Witts JD. 2015. Late Cretaceous (Maastrichtian) shallow water hydrocarbon seeps from Snow Hill and Seymour Islands, James Ross Basin, Antarctica. Palaeogeography, Palaeoclimatology, Palaeoecology 418:213-228.

Majima R, Nobuhara T, Kitazaki T. 2005. Review of chemosynthetic assemblages in Japan. Palaeogeography, Palaeoclimatology, Palaeoecology 227:86-123.

Mazzini A, Duranti D, Jonk R, Parnell J, Cronin BT, Hurst A, Quine M. 2003. Palaeo-carbonate seep structures above an oil reservoir, Gryphon Field, Tertiary, North Sea. Geo-Marine Letters 23:323-339.

Nelson CS, Nyman SL, Campbell KA, Rowland JR. 2017. Influence of faulting on the distribution and development of cold seep-related dolomitic conduit concretions at East Cape, New Zealand. New Zealand Journal of Geology and Geophysics 60:478-496.

Nyman SL, Nelson CS. 2011. The place of tubular concretions in hydrocarbon cold seep systems: late Miocene Urenui Formation, Taranaki Basin, New Zealand. American Association of Petroleum Geologists Bulletin 95:1495-1524.

Nyman SL, Nelson CS, Campbell KA. 2010. Miocene tubular concretions in East Coast Basin, New Zealand: Analogue for the subsurface plumbing of cold seeps. Marine Geology 272:319-336.

Oppo D, Capozzi R, Picotti V, Ponza A. 2015. A genetic model of hydrocarbon-derived carbonate chimneys in shelfal fine-grained sediments: The Enza River field, Northern Apennines (Italy). Marine and Petroleum Geology 66:555-565.

Orpin AR. 1997. Dolomite chimneys as possible evidence of coastal fluid expulsion, uppermost Otago continental slope, southern New Zealand. Marine Geology 138:51-67.

Pierre C, Blanc-Valleron M-M, Demange J, Boudouma O, Foucher J-P, Pape T, Himmler T, Fekete N, Spiess V. 2012. Authigenic carbonates from active methane seeps offshore southwest Africa. Geo-Marine Letters 32:501-513.

Pierre C, Rouchy J-M, Blanc-Valleron M-M. 2002. Gas hydrate dissociation in the Lorca Basin (SE Spain) during the Mediterranean Messinian salinity crisis. Sedimentary Geology 147:247-252.

Pierre C, Rouchy J-M. 2004. Isotopic compositions of diagenetic dolomites in the Tortonian marls of the western Mediterranean margins: evidence of past gas hydrate formation and dissociation. Chemical Geology 205:469-484.

Reitner J, Blumenberg M, Walliser E-O, Schäfer N, Duda J-P. 2015. Methane-derived carbonate conduits from the late Aptian of Salinac (Marne Bleues, Vocontian Basin, France): Petrology and biosignatures. Marine and Petroleum Geology 66:641-652.

Sassen R, MacDonald IR, Guinasso NL, Joye S, Requejo AG, Sweet ST, Alcalá-Herrera J, DeFreitus DA, Schink DR. 1998. Bacterial methane oxidation in sea-floor gas hydrate: Significance to life in extreme environments. Geology 26:851-854.

Schwartz H, Sample J, Weberling KD, Minisini D, Moore JC. 2003. An ancient linked fluid migration system: cold-seep deposits and sandstone intrusions in the Panoche Hills, California, USA. Geo-Marine Letters 23:340-350.

Stakes D, Orange D, Paduan JB, Salamy KA, Maher N. 1999. Cold seeps and authigenic carbonate formation in Monterey Bay, California. Marine Geology 159:93-109.

Teichert BM, Gussone N, Eisenhauer A, Bohrmann G. 2005. Clathrites: archives of near-seafloor pore-fluid evolution (δ44/40Ca, δ13C, δ18O) in gas hydrate environments. Geology 33:213-216.

Wiese F, Kiel S, Pack A, Walliser EO, Agirrezabala LM. 2015. The beast burrowed, the fluid followed - Crustacean burrows as methane conduits. Marine and Petroleum Geology 66:631-640.

Zwicker J, Smrzka D, Gier S, Goedert JL, Peckmann J. 2015. Mineralized conduits are part of the uppermost plumbing system of Oligocene methane-seep deposits, Washington State (USA). Marine and Petroleum Geology 66:616-630.
